# Supplementary material for: Analysing 11 years of incidence trends, clinicopathological characteristics, and forecasts of colorectal cancer in young and old patients: a retrospective cross-sectional study in an Indonesian national referral hospital
Source: HighWire-hosted journal article supplement (doi:10.1136/bmjopen-2022-060839), 2022-09-01
Supplement: bmjopen-2022-060839supp001_data_supplement.pdf [file bmjopen-2022-060839supp001_data_supplement.pdf]

**Supplementary File 1.**

**Detailed analysis of annual incidence trend of colorectal cancer using Joinpoint regression analysis among all patients based on tumor location and tumor side involvement.**

**a. Trend Analysis for Total CRC Cases**

## 1. Graph

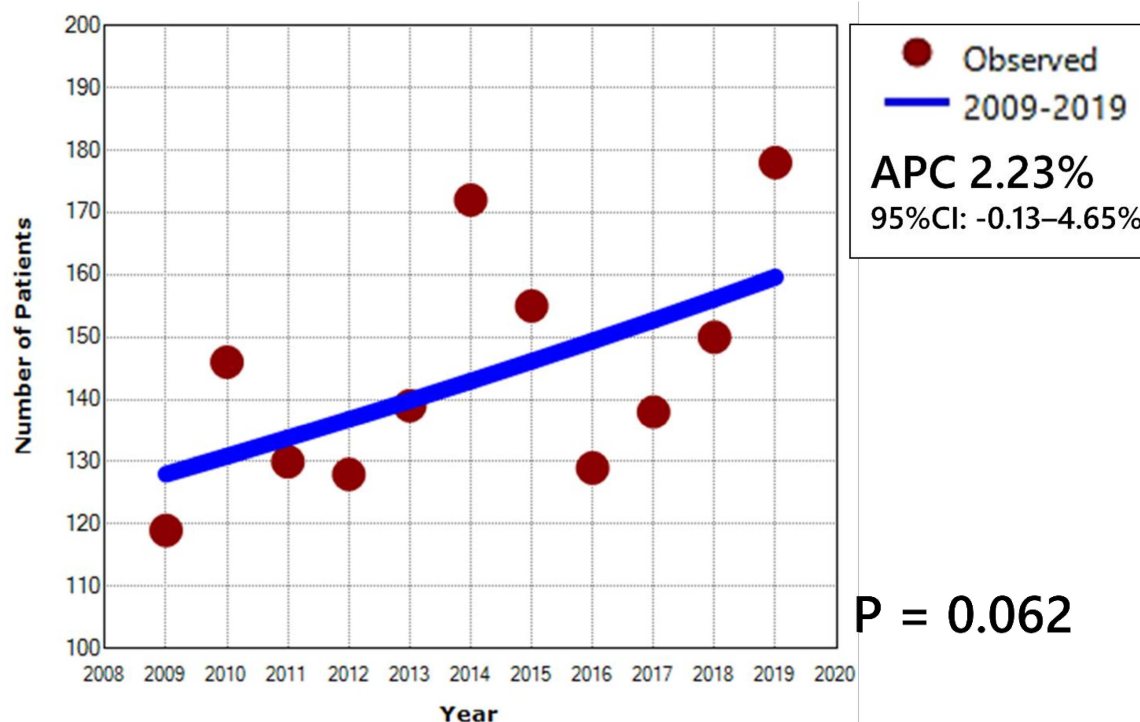

2. The significance test results using the Monte Carlo permutation statistical method to determine the time series's best-fitted line segment(s) to represent substantial trend changes (referred to as APC value) in Joinpoint regression analysis.

| Annual Percent Change (APC)                                                                                                                 |                |                |      |          |          |                    |           |
|---------------------------------------------------------------------------------------------------------------------------------------------|----------------|----------------|------|----------|----------|--------------------|-----------|
| Segment                                                                                                                                     | Lower Endpoint | Upper Endpoint | APC  | Lower CI | Upper CI | Test Statistic (t) | Prob >  t |
| 1                                                                                                                                           | 2009.00        | 2019.00        | 2.23 | -0.13    | 4.65     | 2.13               | 0.062     |
| * Indicates that the Annual Percent Change (APC) is significantly different from zero at the alpha = 0.05 level                             |                |                |      |          |          |                    |           |
| Average Annual Percent Change (AAPC)                                                                                                        |                |                |      |          |          |                    |           |
| Range                                                                                                                                       | Lower Endpoint | Upper Endpoint | AAPC | Lower CI | Upper CI | Test Statistic~    | P-Value~  |
| Full Range                                                                                                                                  | 2009.00        | 2019.00        | 2.23 | -0.13    | 4.65     | 2.13               | 0.062     |
| * Indicates that the AAPC is significantly different from zero at the alpha = 0.05 level.                                                   |                |                |      |          |          |                    |           |
| ~ If the AAPC is within one segment, the t-distribution is used. Otherwise, the normal (z) distribution is used. <a href="#">Learn More</a> |                |                |      |          |          |                    |           |

## b. Trend Analysis for Total Colon Cancer Cases

### 1. Graph

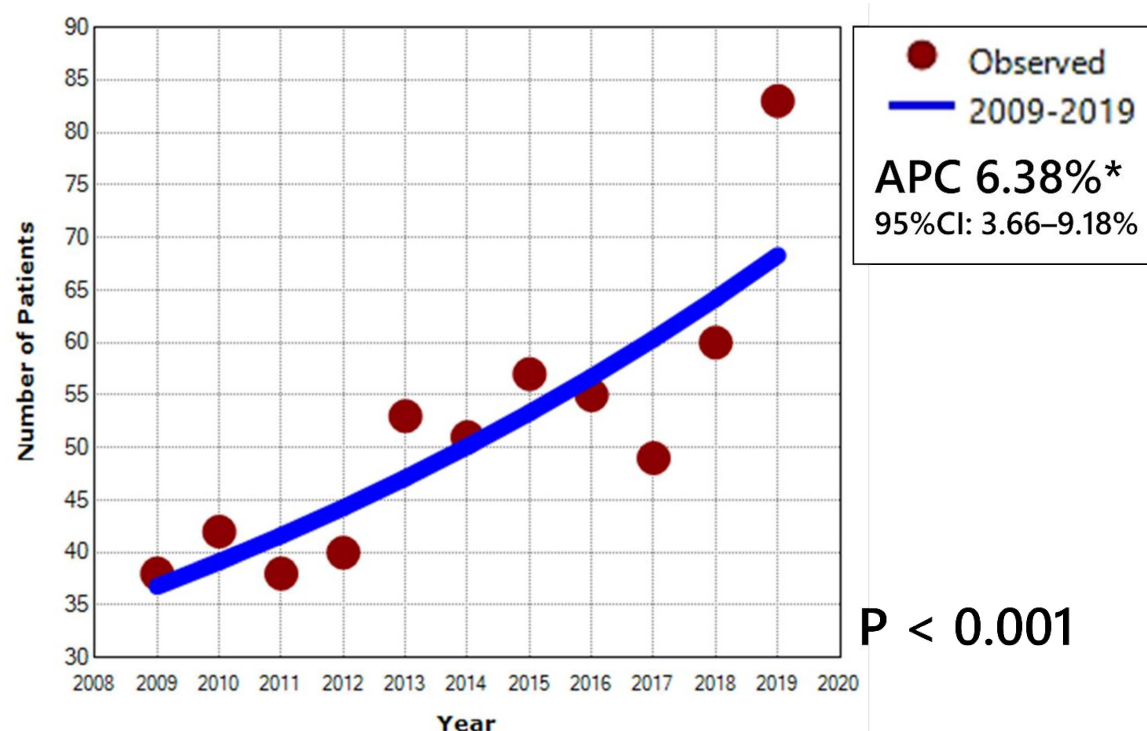

2. The significance test results using the Monte Carlo permutation statistical method to determine the time series's best-fitted line segment(s) to represent substantial trend changes (referred to as APC value) in Joinpoint regression analysis.

| Annual Percent Change (APC)                                                                                                                 |                |                |       |          |          |                    |           |
|---------------------------------------------------------------------------------------------------------------------------------------------|----------------|----------------|-------|----------|----------|--------------------|-----------|
| Segment                                                                                                                                     | Lower Endpoint | Upper Endpoint | APC   | Lower CI | Upper CI | Test Statistic (t) | Prob >  t |
| 1                                                                                                                                           | 2009.00        | 2019.00        | 6.38* | 3.66     | 9.18     | 5.39               | < 0.001   |
| * Indicates that the Annual Percent Change (APC) is significantly different from zero at the alpha = 0.05 level                             |                |                |       |          |          |                    |           |
| Average Annual Percent Change (AAPC)                                                                                                        |                |                |       |          |          |                    |           |
| Range                                                                                                                                       | Lower Endpoint | Upper Endpoint | AAPC  | Lower CI | Upper CI | Test Statistic~    | P-Value~  |
| Full Range                                                                                                                                  | 2009.00        | 2019.00        | 6.38* | 3.66     | 9.18     | 5.39               | < 0.001   |
| * Indicates that the AAPC is significantly different from zero at the alpha = 0.05 level.                                                   |                |                |       |          |          |                    |           |
| ~ If the AAPC is within one segment, the t-distribution is used. Otherwise, the normal (z) distribution is used. <a href="#">Learn More</a> |                |                |       |          |          |                    |           |

**c. Trend Analysis for Total Rectal Cancer Cases**

1. Graph

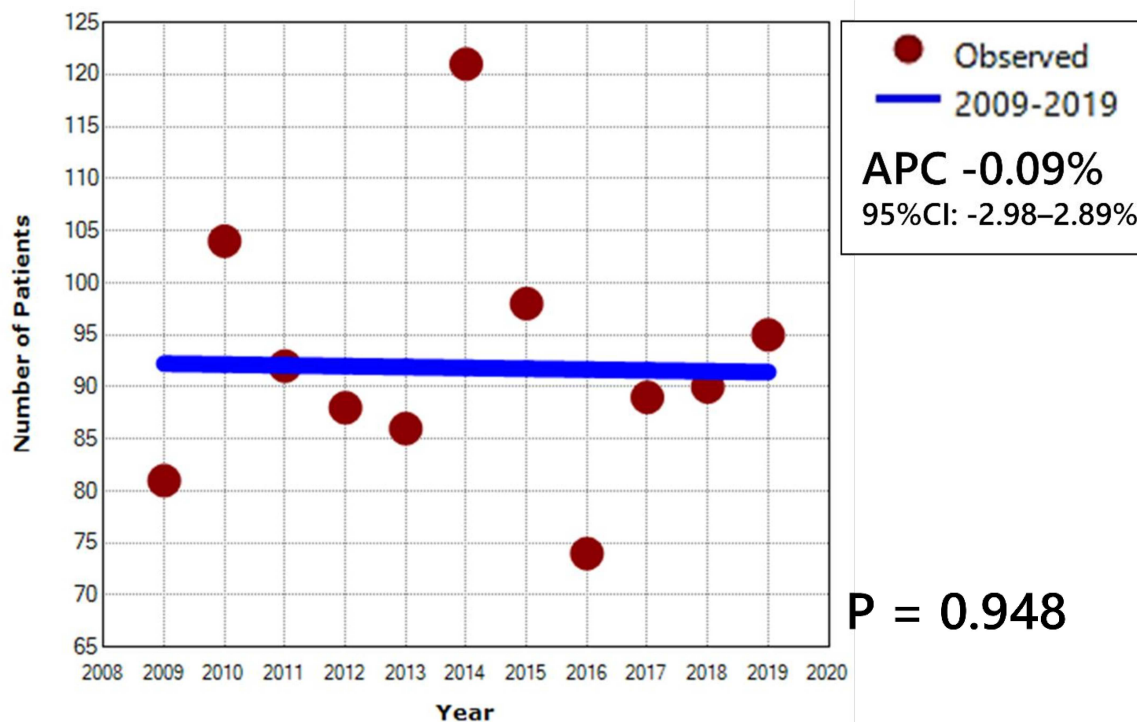

2. The significance test results using the Monte Carlo permutation statistical method to determine the time series's best-fitted line segment(s) to represent substantial trend changes (referred to as APC value) in Joinpoint regression analysis.

| Annual Percent Change (APC)                                                                                                                 |                |                |       |          |          |                    |           |
|---------------------------------------------------------------------------------------------------------------------------------------------|----------------|----------------|-------|----------|----------|--------------------|-----------|
| Segment                                                                                                                                     | Lower Endpoint | Upper Endpoint | APC   | Lower CI | Upper CI | Test Statistic (t) | Prob >  t |
| 1                                                                                                                                           | 2009.00        | 2019.00        | -0.09 | -2.98    | 2.89     | -0.07              | 0.948     |
| * Indicates that the Annual Percent Change (APC) is significantly different from zero at the alpha = 0.05 level                             |                |                |       |          |          |                    |           |
| Average Annual Percent Change (AAPC)                                                                                                        |                |                |       |          |          |                    |           |
| Range                                                                                                                                       | Lower Endpoint | Upper Endpoint | AAPC  | Lower CI | Upper CI | Test Statistic~    | P-Value~  |
| Full Range                                                                                                                                  | 2009.00        | 2019.00        | -0.09 | -2.98    | 2.89     | -0.07              | 0.948     |
| * Indicates that the AAPC is significantly different from zero at the alpha = 0.05 level.                                                   |                |                |       |          |          |                    |           |
| ~ If the AAPC is within one segment, the t-distribution is used. Otherwise, the normal (z) distribution is used. <a href="#">Learn More</a> |                |                |       |          |          |                    |           |

#### d. Trend Analysis for Total Right-Sided CRC Cases

##### 1. Graph

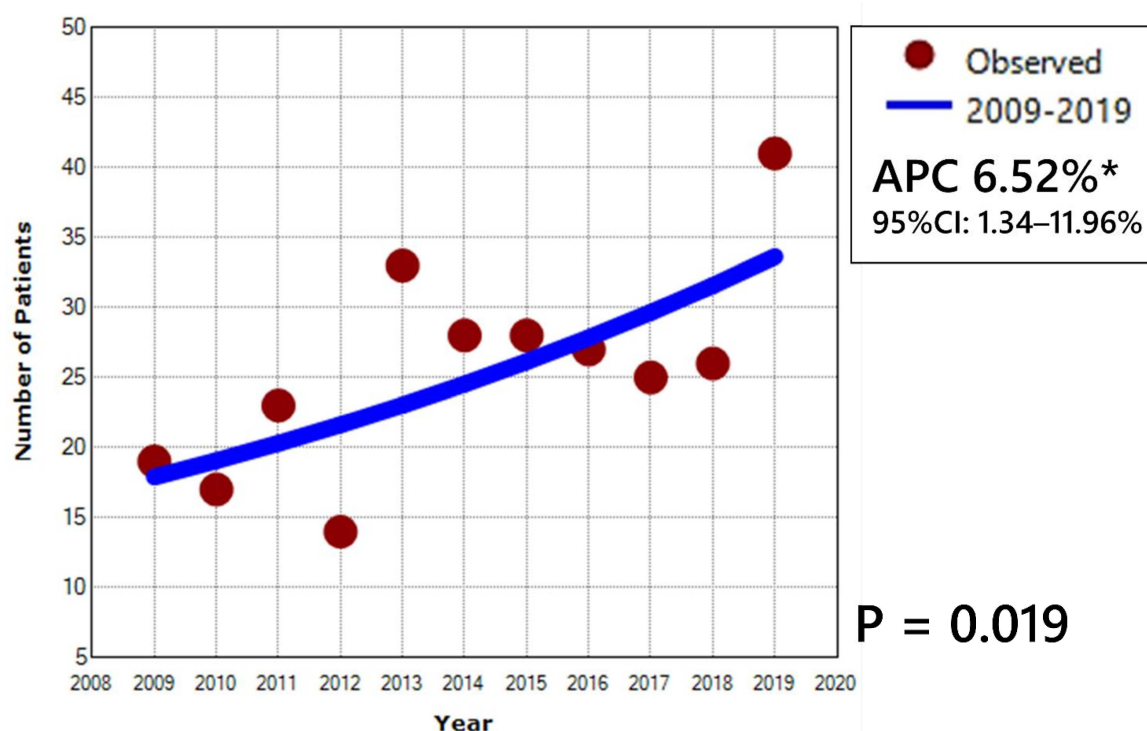

2. The significance test results using the Monte Carlo permutation statistical method to determine the time series's best-fitted line segment(s) to represent substantial trend changes (referred to as APC value) in Joinpoint regression analysis.

| Annual Percent Change (APC)                                                                                                                 |                |                |       |          |          |                    |           |
|---------------------------------------------------------------------------------------------------------------------------------------------|----------------|----------------|-------|----------|----------|--------------------|-----------|
| Segment                                                                                                                                     | Lower Endpoint | Upper Endpoint | APC   | Lower CI | Upper CI | Test Statistic (t) | Prob >  t |
| 1                                                                                                                                           | 2009.00        | 2019.00        | 6.52* | 1.34     | 11.96    | 2.87               | 0.019     |
| * Indicates that the Annual Percent Change (APC) is significantly different from zero at the alpha = 0.05 level                             |                |                |       |          |          |                    |           |
| Average Annual Percent Change (AAPC)                                                                                                        |                |                |       |          |          |                    |           |
| Range                                                                                                                                       | Lower Endpoint | Upper Endpoint | AAPC  | Lower CI | Upper CI | Test Statistic~    | P-Value~  |
| Full Range                                                                                                                                  | 2009.00        | 2019.00        | 6.52* | 1.34     | 11.96    | 2.87               | 0.019     |
| * Indicates that the AAPC is significantly different from zero at the alpha = 0.05 level.                                                   |                |                |       |          |          |                    |           |
| ~ If the AAPC is within one segment, the t-distribution is used. Otherwise, the normal (z) distribution is used. <a href="#">Learn More</a> |                |                |       |          |          |                    |           |

### e. Trend Analysis for Total Left-Sided CRC Cases

#### 1. Graph

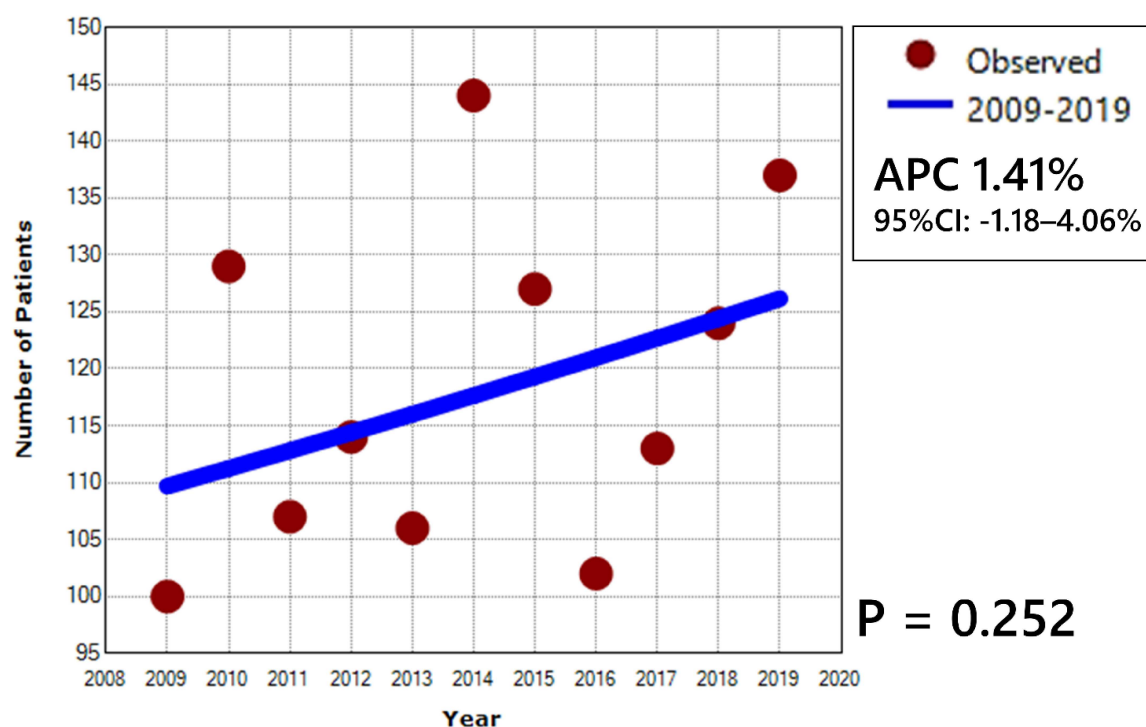

2. The significance test results using the Monte Carlo permutation statistical method to determine the time series's best-fitted line segment(s) to represent substantial trend changes (referred to as APC value) in Joinpoint regression analysis.

| Annual Percent Change (APC)                                                                                                                 |                |                |      |          |          |                    |           |
|---------------------------------------------------------------------------------------------------------------------------------------------|----------------|----------------|------|----------|----------|--------------------|-----------|
| Segment                                                                                                                                     | Lower Endpoint | Upper Endpoint | APC  | Lower CI | Upper CI | Test Statistic (t) | Prob >  t |
| 1                                                                                                                                           | 2009.00        | 2019.00        | 1.41 | -1.18    | 4.06     | 1.23               | 0.252     |
| * Indicates that the Annual Percent Change (APC) is significantly different from zero at the alpha = 0.05 level                             |                |                |      |          |          |                    |           |
| Average Annual Percent Change (AAPC)                                                                                                        |                |                |      |          |          |                    |           |
| Range                                                                                                                                       | Lower Endpoint | Upper Endpoint | AAPC | Lower CI | Upper CI | Test Statistic~    | P-Value~  |
| Full Range                                                                                                                                  | 2009.00        | 2019.00        | 1.41 | -1.18    | 4.06     | 1.23               | 0.252     |
| * Indicates that the AAPC is significantly different from zero at the alpha = 0.05 level.                                                   |                |                |      |          |          |                    |           |
| ~ If the AAPC is within one segment, the t-distribution is used. Otherwise, the normal (z) distribution is used. <a href="#">Learn More</a> |                |                |      |          |          |                    |           |

## f. Trend Analysis for Total CRC Cases Originated from Caecum

### 1. Graph

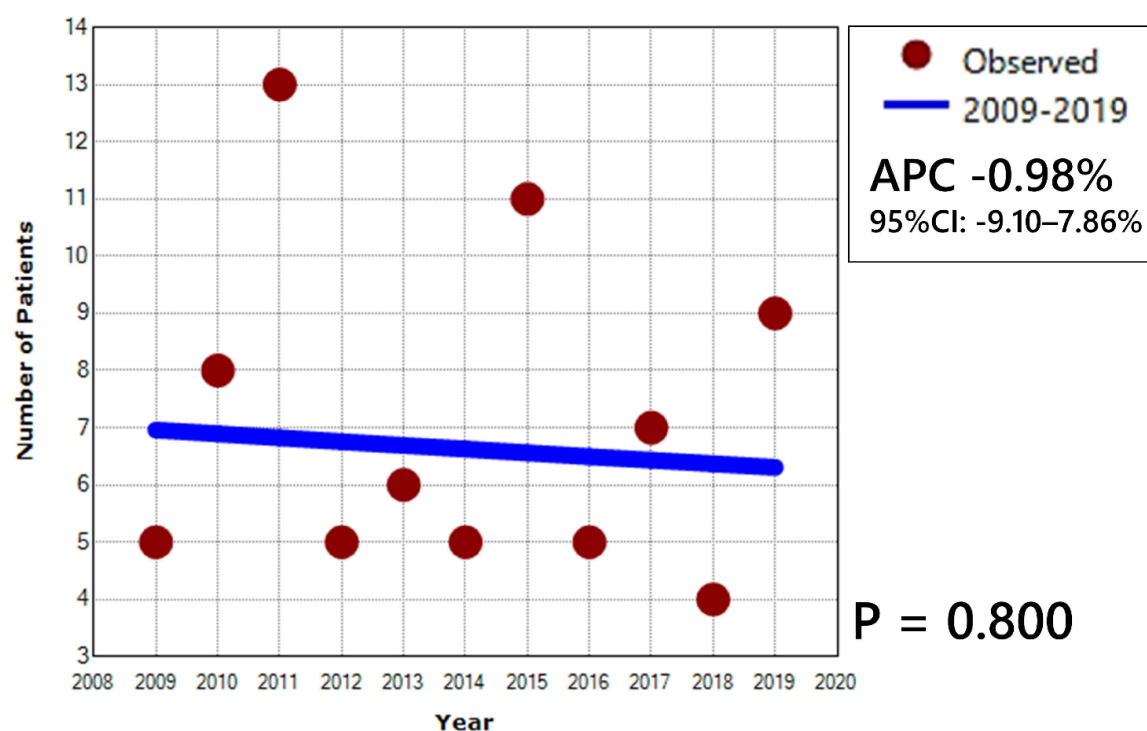

2. The significance test results using the Monte Carlo permutation statistical method to determine the time series's best-fitted line segment(s) to represent substantial trend changes (referred to as APC value) in Joinpoint regression analysis.

| Annual Percent Change (APC)                                                                                                                 |                |                |       |          |          |                    |           |
|---------------------------------------------------------------------------------------------------------------------------------------------|----------------|----------------|-------|----------|----------|--------------------|-----------|
| Segment                                                                                                                                     | Lower Endpoint | Upper Endpoint | APC   | Lower CI | Upper CI | Test Statistic (t) | Prob >  t |
| 1                                                                                                                                           | 2009.00        | 2019.00        | -0.98 | -9.10    | 7.86     | -0.26              | 0.800     |
| * Indicates that the Annual Percent Change (APC) is significantly different from zero at the alpha = 0.05 level                             |                |                |       |          |          |                    |           |
| Average Annual Percent Change (AAPC)                                                                                                        |                |                |       |          |          |                    |           |
| Range                                                                                                                                       | Lower Endpoint | Upper Endpoint | AAPC  | Lower CI | Upper CI | Test Statistic~    | P-Value~  |
| Full Range                                                                                                                                  | 2009.00        | 2019.00        | -0.98 | -9.10    | 7.86     | -0.26              | 0.800     |
| * Indicates that the AAPC is significantly different from zero at the alpha = 0.05 level.                                                   |                |                |       |          |          |                    |           |
| ~ If the AAPC is within one segment, the t-distribution is used. Otherwise, the normal (z) distribution is used. <a href="#">Learn More</a> |                |                |       |          |          |                    |           |

### g. Trend Analysis for Total CRC Cases Originated from Ascending Colon

#### 1. Graph

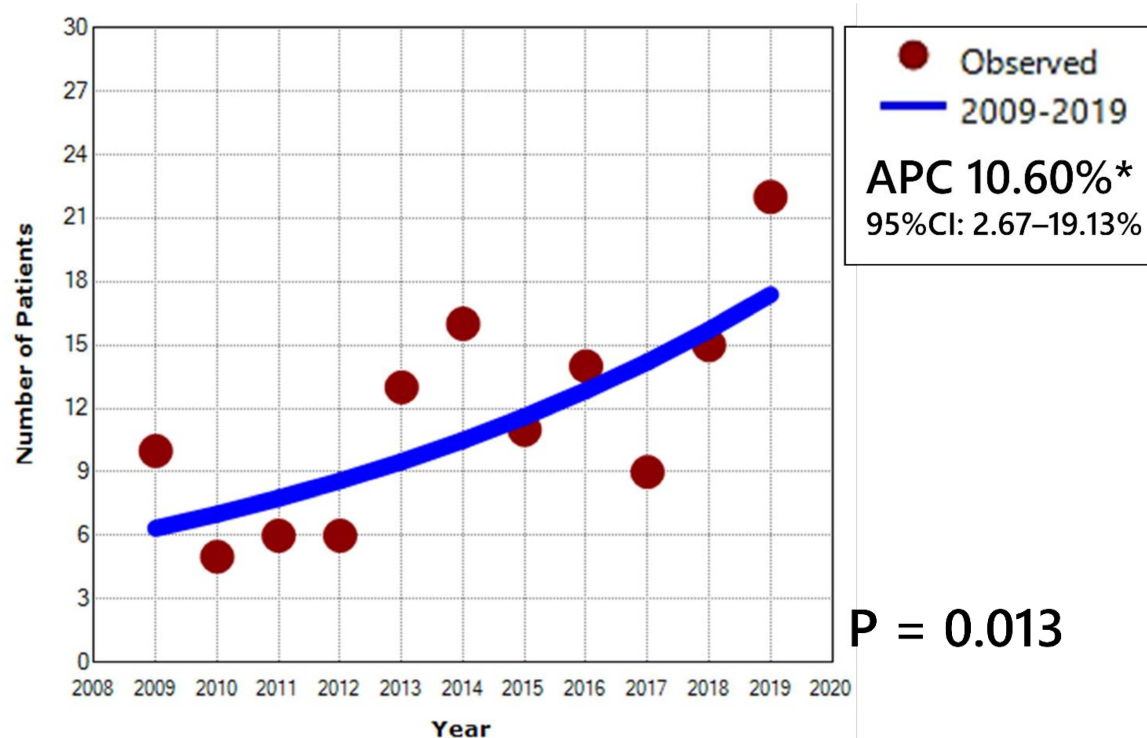

2. The significance test results using the Monte Carlo permutation statistical method to determine the time series's best-fitted line segment(s) to represent substantial trend changes (referred to as APC value) in Joinpoint regression analysis.

| Annual Percent Change (APC)                                                                                                                 |                |                |        |          |          |                    |           |
|---------------------------------------------------------------------------------------------------------------------------------------------|----------------|----------------|--------|----------|----------|--------------------|-----------|
| Segment                                                                                                                                     | Lower Endpoint | Upper Endpoint | APC    | Lower CI | Upper CI | Test Statistic (t) | Prob >  t |
| 1                                                                                                                                           | 2009.00        | 2019.00        | 10.60* | 2.67     | 19.13    | 3.07               | 0.013     |
| * Indicates that the Annual Percent Change (APC) is significantly different from zero at the alpha = 0.05 level                             |                |                |        |          |          |                    |           |
| Average Annual Percent Change (AAPC)                                                                                                        |                |                |        |          |          |                    |           |
| Range                                                                                                                                       | Lower Endpoint | Upper Endpoint | AAPC   | Lower CI | Upper CI | Test Statistic~    | P-Value~  |
| Full Range                                                                                                                                  | 2009.00        | 2019.00        | 10.60* | 2.67     | 19.13    | 3.07               | 0.013     |
| * Indicates that the AAPC is significantly different from zero at the alpha = 0.05 level.                                                   |                |                |        |          |          |                    |           |
| ~ If the AAPC is within one segment, the t-distribution is used. Otherwise, the normal (z) distribution is used. <a href="#">Learn More</a> |                |                |        |          |          |                    |           |

## h. Trend Analysis for Total CRC Cases Originated from Transverse Colon

### 1. Graph

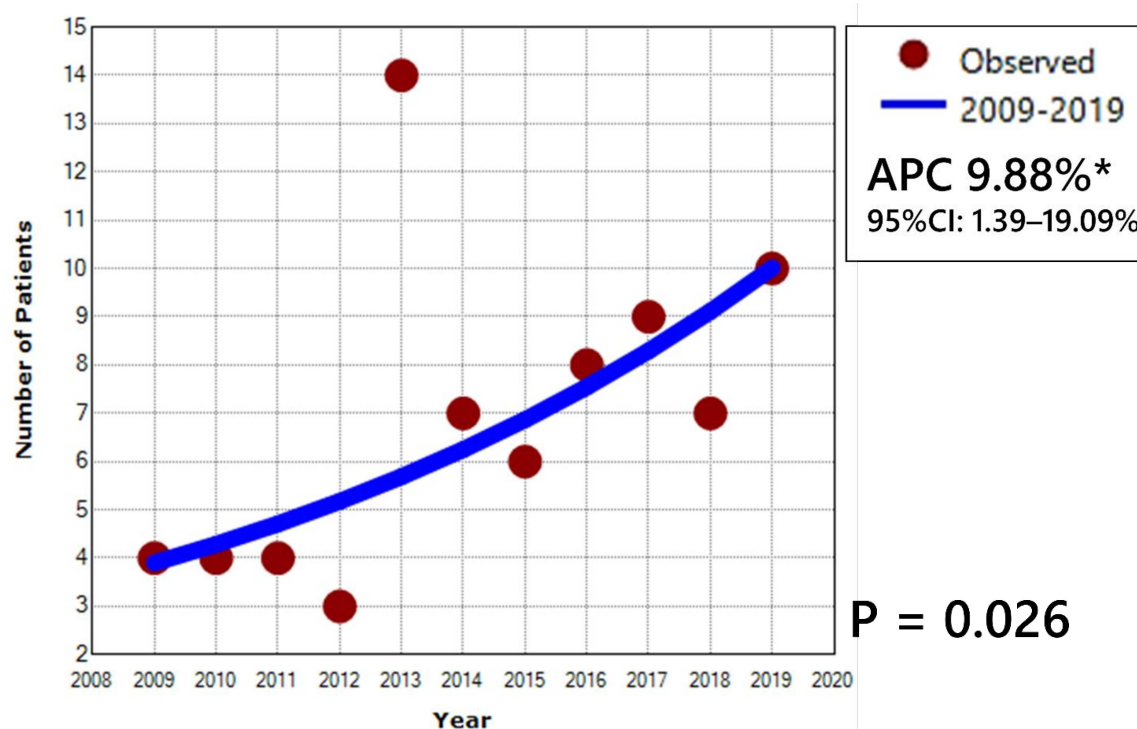

2. The significance test results using the Monte Carlo permutation statistical method to determine the time series's best-fitted line segment(s) to represent substantial trend changes (referred to as APC value) in Joinpoint regression analysis.

| Annual Percent Change (APC)                                                                                                                 |                |                |       |          |          |                    |           |
|---------------------------------------------------------------------------------------------------------------------------------------------|----------------|----------------|-------|----------|----------|--------------------|-----------|
| Segment                                                                                                                                     | Lower Endpoint | Upper Endpoint | APC   | Lower CI | Upper CI | Test Statistic (t) | Prob >  t |
| 1                                                                                                                                           | 2009.00        | 2019.00        | 9.88* | 1.39     | 19.09    | 2.65               | 0.026     |
| * Indicates that the Annual Percent Change (APC) is significantly different from zero at the alpha = 0.05 level                             |                |                |       |          |          |                    |           |
| Average Annual Percent Change (AAPC)                                                                                                        |                |                |       |          |          |                    |           |
| Range                                                                                                                                       | Lower Endpoint | Upper Endpoint | AAPC  | Lower CI | Upper CI | Test Statistic~    | P-Value~  |
| Full Range                                                                                                                                  | 2009.00        | 2019.00        | 9.88* | 1.39     | 19.09    | 2.65               | 0.026     |
| * Indicates that the AAPC is significantly different from zero at the alpha = 0.05 level.                                                   |                |                |       |          |          |                    |           |
| ~ If the AAPC is within one segment, the t-distribution is used. Otherwise, the normal (z) distribution is used. <a href="#">Learn More</a> |                |                |       |          |          |                    |           |



### i. Trend Analysis for Total CRC Cases Originated from Descending Colon

#### 1. Graph

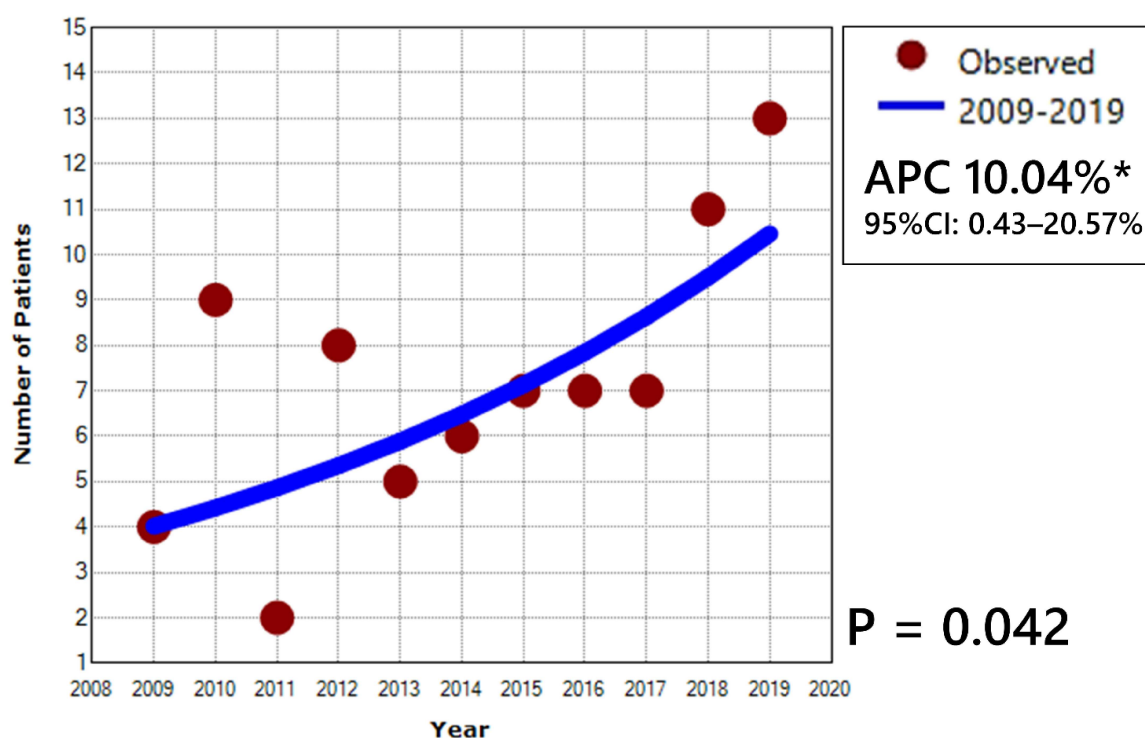

2. The significance test results using the Monte Carlo permutation statistical method to determine the time series's best-fitted line segment(s) to represent substantial trend changes (referred to as APC value) in Joinpoint regression analysis.

| Annual Percent Change (APC)                                                                                                                 |                |                |        |          |          |                    |           |
|---------------------------------------------------------------------------------------------------------------------------------------------|----------------|----------------|--------|----------|----------|--------------------|-----------|
| Segment                                                                                                                                     | Lower Endpoint | Upper Endpoint | APC    | Lower CI | Upper CI | Test Statistic (t) | Prob >  t |
| 1                                                                                                                                           | 2009.00        | 2019.00        | 10.04* | 0.43     | 20.57    | 2.37               | 0.042     |
| * Indicates that the Annual Percent Change (APC) is significantly different from zero at the alpha = 0.05 level                             |                |                |        |          |          |                    |           |
| Average Annual Percent Change (AAPC)                                                                                                        |                |                |        |          |          |                    |           |
| Range                                                                                                                                       | Lower Endpoint | Upper Endpoint | AAPC   | Lower CI | Upper CI | Test Statistic~    | P-Value~  |
| Full Range                                                                                                                                  | 2009.00        | 2019.00        | 10.04* | 0.43     | 20.57    | 2.37               | 0.042     |
| * Indicates that the AAPC is significantly different from zero at the alpha = 0.05 level.                                                   |                |                |        |          |          |                    |           |
| ~ If the AAPC is within one segment, the t-distribution is used. Otherwise, the normal (z) distribution is used. <a href="#">Learn More</a> |                |                |        |          |          |                    |           |

## j. Trend Analysis for Total CRC Cases Originated from Sigmoid

### 1. Graph

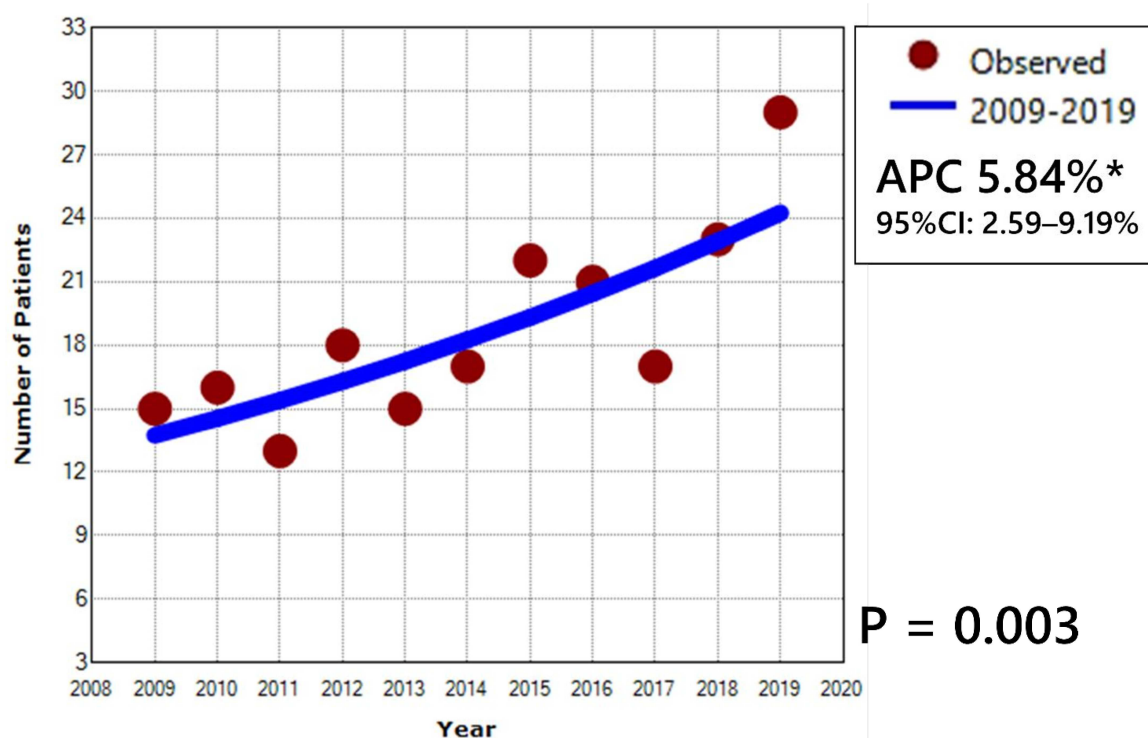

2. The significance test results using the Monte Carlo permutation statistical method to determine the time series's best-fitted line segment(s) to represent substantial trend changes (referred to as APC value) in Joinpoint regression analysis.

| Annual Percent Change (APC)                                                                                                                 |                |                |       |          |          |                    |           |
|---------------------------------------------------------------------------------------------------------------------------------------------|----------------|----------------|-------|----------|----------|--------------------|-----------|
| Segment                                                                                                                                     | Lower Endpoint | Upper Endpoint | APC   | Lower CI | Upper CI | Test Statistic (t) | Prob >  t |
| 1                                                                                                                                           | 2009.00        | 2019.00        | 5.84* | 2.59     | 9.19     | 4.12               | 0.003     |
| * Indicates that the Annual Percent Change (APC) is significantly different from zero at the alpha = 0.05 level                             |                |                |       |          |          |                    |           |
| Average Annual Percent Change (AAPC)                                                                                                        |                |                |       |          |          |                    |           |
| Range                                                                                                                                       | Lower Endpoint | Upper Endpoint | AAPC  | Lower CI | Upper CI | Test Statistic~    | P-Value~  |
| Full Range                                                                                                                                  | 2009.00        | 2019.00        | 5.84* | 2.59     | 9.19     | 4.12               | 0.003     |
| * Indicates that the AAPC is significantly different from zero at the alpha = 0.05 level.                                                   |                |                |       |          |          |                    |           |
| ~ If the AAPC is within one segment, the t-distribution is used. Otherwise, the normal (z) distribution is used. <a href="#">Learn More</a> |                |                |       |          |          |                    |           |
